# Supplementary material
Source: MDPI journal article supplement (https://www.mdpi.com/2077-1312/12/1/166)
Supplement: s1 [file s1]

Archive with 3 entries (3 files):
- jmse-2654245_Supplement.pdf
- jmse-2654245_Supplement_Nomenclature_oh.pdf
- jmse-2654245_Supplement_Table S1(landscape)_oh.pdf
