# Supplementary material
Source: MDPI journal article supplement (https://www.mdpi.com/2077-1312/12/1/166)
Supplement: s1 [file s1]

Table S1. Compilation of water-vapor mass transfer coefficients from the literature (selection).

|                                                                                                                                                                                                                                                                                                                                                                                                                                                                                                                                                                                                                                                                                                                                                                                                                                                                                                                                                                                                                                                                                                                        |                                                                                                                                                                                                                                                         |
|------------------------------------------------------------------------------------------------------------------------------------------------------------------------------------------------------------------------------------------------------------------------------------------------------------------------------------------------------------------------------------------------------------------------------------------------------------------------------------------------------------------------------------------------------------------------------------------------------------------------------------------------------------------------------------------------------------------------------------------------------------------------------------------------------------------------------------------------------------------------------------------------------------------------------------------------------------------------------------------------------------------------------------------------------------------------------------------------------------------------|---------------------------------------------------------------------------------------------------------------------------------------------------------------------------------------------------------------------------------------------------------|
| Vapor-pressure based formulation of Daltons evaporation formula (e.g., Wüst 1920, Sutton and Simpson 1934, Sverdrup 1937, Tomczak 1939, Jacobs 1942, 1951, DWA 2018) [22, 93, 175, 95, 91, 92, 107]                                                                                                                                                                                                                                                                                                                                                                                                                                                                                                                                                                                                                                                                                                                                                                                                                                                                                                                    |                                                                                                                                                                                                                                                         |
| $E = \frac{J_E}{\varrho_W} = \frac{J_q}{\varrho_W L_V} = D_e [e_{eq}(S_A, T) - e]$ $D_e = a(1 + 3.66 \cdot 10^{-3} \vartheta/^{\circ}\text{C})(1 + bU/(\text{km h}^{-1}))$ $a = (4.6 - 5.64) \cdot 10^{-11} \text{ m}^2\text{s kg}^{-1}, \quad b = 0.075 - 0.11$ $D_e = a(U/U_R), \quad a = (0.94 - 1.24) \cdot 10^{-11} \text{ m}^2\text{s kg}^{-1}$ $D_e = \omega[a + b(U/U_R)^{\varepsilon}],$ $\omega = 8.7 \cdot 10^{-11} \text{ m}^2\text{s kg}^{-1}, \quad a = 0.16, \quad b = 0.18, \quad \varepsilon = \frac{2 - n_{turb}}{2 + n_{turb}} = 0.84$ $D_e = f_U(U)$                                                                                                                                                                                                                                                                                                                                                                                                                                                                                                                                               | <p>Wüst (1920, pp. 39-41) [22]</p> <p>Jacobs (1942, 1951) [91, 92]</p> <p>Sutton and Simpson (1934), Tomczak (1939) [93, 95]</p> <p>Compilation of different wind functions: Vietinghoff (2000, pp. 51-60), DWA (2018, p. 117, Table 15) [106, 107]</p> |
| Specific-humidity based formulation of Daltons evaporation formula (e.g., Budyko 1963, pp. 74-76, Eqs. (68), (69), (73), Sellers 1965, p. 145, Eq. (10.9), Kondo 1975, Eq. (2), Liu et al. 1979, Eq. (1b), Foken 1984, Eq. (10), Smith 1988, Eq. (3), Pal Arya 1988, p. 188, Eq. (12.13), Kondo et al. 1990, Eqs. (1), (2), Ruprecht and Simmer 1991, Section 2, Schmugge and André 1991, p. 72, Eqs. (4.6)-(4.8), Garratt 1992, p. 56, Eq. (3.51), Miller et al. 1992, Eq. (1), Kraus and Businger 1994, pp. 180-181, Kaimal and Finnigan 1994, p. 13, Eq. (1.17), p. 70, Eq. (3.13), Zhang and McPhaden 1995, Eq. (1b), Stull 1997, p. 263, Eq. (7.4.1e), Fairall et al. 2003a, Liu et al. 2007, Yu 2007, Eq. (1), Stewart 2008, p. 58, Eq. (5.10c), Table 5.1, Liu et al. 2013, Eq. (5), Rosenberg 2016, Eq. (2), Kumar et al. 2017, Eq. (1), Cronin et al. 2019, Eq. (1.6b), Yu 2019, Eq. (3), Hogan 2020, Reeves Eyre et al. 2021, Eq. (3), Table 1, Song et al. 2022, Eq. (1)) [27, 26, 160, 161, 164, 155, 111, 176, 177, 113, 114, 156, 45, 115, 178, 116, 133, 179, 180, 30, 158, 181, 182, 11, 142, 183-185] |                                                                                                                                                                                                                                                         |
| $J_q = \varrho_{AV} L_V D_q [q_{eq}(S_A, T) - q], \quad D_q = C_E U$ $D_q = \frac{K_m U}{U \delta_m + \frac{K_m}{\kappa^2} \left( \frac{z_1 + z_0}{z_0} \right)^2}, \quad \delta_m = (1 - 1.5) \cdot 10^{-3} \text{ m}, \quad \kappa = 0.4$                                                                                                                                                                                                                                                                                                                                                                                                                                                                                                                                                                                                                                                                                                                                                                                                                                                                            | <p>Sverdrup (1936), Budyko (1963, Eq. (69)) [23, 27]</p>                                                                                                                                                                                                |

|                                                                                                                                                                                                                                                                                                                                                                                                                                                                                                                                                                                                                                                                                                                     |                                                                                                                                                                                                                                                                                                                                                                                                                                                                                                                                                                                                                                                    |
|---------------------------------------------------------------------------------------------------------------------------------------------------------------------------------------------------------------------------------------------------------------------------------------------------------------------------------------------------------------------------------------------------------------------------------------------------------------------------------------------------------------------------------------------------------------------------------------------------------------------------------------------------------------------------------------------------------------------|----------------------------------------------------------------------------------------------------------------------------------------------------------------------------------------------------------------------------------------------------------------------------------------------------------------------------------------------------------------------------------------------------------------------------------------------------------------------------------------------------------------------------------------------------------------------------------------------------------------------------------------------------|
| $D_q = a + b \left( \frac{U}{U_R} \right), \quad a = \begin{cases} (7 - 45) \cdot 10^{-4} \text{ m s}^{-1} & \text{general range} \\ 7 \cdot 10^{-4} \text{ m s}^{-1} & \text{for large lakes} \end{cases}$ $b = 2 \cdot 10^{-3} \text{ m s}^{-1}$ $D_q = 5 \cdot 10^{-3} \text{ m s}^{-1}$<br>$D_q = \frac{\kappa u_*}{\kappa \text{Pr}_m \hat{\delta}_{m,q} + 4 \kappa + \ln \left( \frac{\zeta_c L u_*}{20 K_{m,U}} \right) + \frac{1}{n} \left[ 1 - \left( \frac{z}{\zeta_c L} \right)^{-n} \right]}$<br>$\hat{\delta}_{m,q} = \frac{\delta_{m,q} u_*}{K_{m,U}} = 6, \quad \{\zeta_c, n\} = \begin{cases} \{-0.075, 0.5\}, & -2.5 \leq \zeta \leq -0.075 \\ \{0.16, -2\}, & 0.16 \leq \zeta \leq 1 \end{cases}$ | <p>Sellers (1965, p. 159, Eq. (11.2)) [26]</p><br><p>Kaimal and Finnigan (1994, pp. 73-76, Eq. (3.21), Table 3.1) [115]</p><br><p>Foken (1984, Eq. (10)) [164]</p><br><p>Skeib and Richter (1984) [151]</p>                                                                                                                                                                                                                                                                                                                                                                                                                                        |
| Specific-humidity based formulation of Daltons evaporation formula with correction for subsurface sea-temperature effects according to Kruspe (1977, Eq. (3), Fig. 2) [186]                                                                                                                                                                                                                                                                                                                                                                                                                                                                                                                                         |                                                                                                                                                                                                                                                                                                                                                                                                                                                                                                                                                                                                                                                    |
| $J_q = \varrho_{AV} L_V [C_q U_{10} [q_{eq}(S_A, T) - q_{10}] + b_{\text{corr}}], \quad C_q \times 10^3 = 1.36 \pm 0.25, \quad b_{\text{corr}} = -0.7 \cdot 10^{-5} \text{ m s}^{-1}$                                                                                                                                                                                                                                                                                                                                                                                                                                                                                                                               |                                                                                                                                                                                                                                                                                                                                                                                                                                                                                                                                                                                                                                                    |
| Formulations of the Dalton number for neutral, stable, and unstable stratification from different sources                                                                                                                                                                                                                                                                                                                                                                                                                                                                                                                                                                                                           |                                                                                                                                                                                                                                                                                                                                                                                                                                                                                                                                                                                                                                                    |
| $C_q^N \times 10^3 = \begin{cases} 1.15 \\ 1 - 5 \\ 1.1 (\pm 15\%) \\ 1.2 \\ (1.1 - 1.2) @ U < 10 \text{ m s}^{-1}, \quad 1.45 @ U \approx 20 \text{ m s}^{-1} \\ 1.2 - 1.5 \\ 1.3 \end{cases}$<br>$C_q = \text{LUT as function of } U \text{ and } \Delta T = T_A - T_{SST}$<br>$C_q = C_q^N \times \begin{cases} (1 - \zeta) [1 + 10^{-2} \beta^{3/4}] & \text{at } \zeta < 0 \text{ (unstable)} \\ \left[ \frac{1}{1 + 3.5 \zeta} \right] [1 + 10^{-2} \beta^{3/4}] & \text{at } \zeta > 0 \text{ (stable)} \\ \zeta = \frac{z}{L}, \quad z_0 = z \exp \left( -\frac{\kappa U}{u_*} \right), \quad \beta = \frac{z_0 u_*}{\nu} \end{cases}$                                                                      | <p>Large and Pond (1982, Table 2, for unstable conditions) [124]</p> <p>Stull (1997, p. 263, Eq. (7.4.1e)) [116]</p> <p>Garratt (1992, pp. 101-104, Fig. 4.9) [114]</p> <p>Smith (1988, best estimate from compilation of empirical data), Kraus and Businger (1994, p. 181 for <math>U = (5 - 20) \text{ m s}^{-1}</math>), Stewart (2008, Table 5.1), Hogan (2020, Eq. (29)) [155, 45, 30, 183]</p> <p>Fairall et al. (2003a, Fig. 3) [133]</p> <p>Liu et al. (2007, Table 3) [179]</p> <p>Kumar et al. (2017, Eq. (1)) [182]</p><br><p>Bunker (1976, Table 4) [187]</p><br><p>Panin et al. (2006, for deep-water air-sea interaction) [188]</p> |

| $C_q = \frac{\kappa^2}{\left[\ln \frac{z}{z_0} - \Psi_U(\zeta)\right] \left[\ln \frac{z}{z_0} - \Psi_q(\zeta)\right]}, \quad \zeta = \frac{z}{L}$ $C_q = \frac{\kappa^2}{\left[\ln \frac{z}{z_0} - \Psi_U(\zeta) + \Psi_U(\zeta_0)\right] \left[\ln \frac{z}{z_0} - \Psi_q(\zeta) + \Psi_q(\zeta_0)\right]}, \quad \zeta = \frac{z}{L}, \zeta_0 = \frac{z_0}{L}$ $\Psi_U(\zeta) = \begin{cases} -5\zeta & \text{for } \zeta \geq 0 \\ \ln \left[ \left( \frac{1+x^2}{2} \right) \left( \frac{1+x}{2} \right)^2 \right] - 2 \arctan x + \frac{\pi}{2} & \text{for } \zeta < 0 \end{cases}$ $\Psi_T(\zeta) = \Psi_q(\zeta) = \begin{cases} -5\zeta & \text{for } \zeta \geq 0 \\ 2 \ln \left( \frac{1+x^2}{2} \right) & \text{for } \zeta < 0 \end{cases}$ $x = (1 - 15 \zeta)^{1/4}$                     | <p>Pal Arya (1988, p. 167, Eq. (11.16)), Garratt (1992, p. 55, Eqs. (3.47)-(3.51)), Stull (1997, p. 267, Eq. (7.4.1m)) [111, 114, 116]</p> <p>Liu et al. (2013, Eqs. (7), (8)) [158]</p> <p>Stability functions for momentum and scalars (e.g., Paulson 1970, Pal Arya 1988, p. 167, Eq. (11.14), Zhang and McPhaden 1995) [145, 111, 178]</p> |                            |         |       |       |       |         |   |      |   |       |       |       |        |   |   |     |      |      |   |   |      |       |       |         |   |       |      |        |   |   |
|---------------------------------------------------------------------------------------------------------------------------------------------------------------------------------------------------------------------------------------------------------------------------------------------------------------------------------------------------------------------------------------------------------------------------------------------------------------------------------------------------------------------------------------------------------------------------------------------------------------------------------------------------------------------------------------------------------------------------------------------------------------------------------------------------------|------------------------------------------------------------------------------------------------------------------------------------------------------------------------------------------------------------------------------------------------------------------------------------------------------------------------------------------------|----------------------------|---------|-------|-------|-------|---------|---|------|---|-------|-------|-------|--------|---|---|-----|------|------|---|---|------|-------|-------|---------|---|-------|------|--------|---|---|
| <p>Parameterization of the Dalton number according to Kondo (1975) on the base of the Owen-Thomson theory of evaporation (Owen and Thomson 1963) (see also Garratt (1992, pp. 90-93) for interfacial sublayer relations) [160, 159, 114]</p>                                                                                                                                                                                                                                                                                                                                                                                                                                                                                                                                                            |                                                                                                                                                                                                                                                                                                                                                |                            |         |       |       |       |         |   |      |   |       |       |       |        |   |   |     |      |      |   |   |      |       |       |         |   |       |      |        |   |   |
| <p>(A) Parameterization for neutral (adiabatic) stratification (Kondo 1975, Fig. 5, Appendix 1, Table A1) [160]</p> $C_q^N(10\text{ m}) \times 10^3 = a_q + b_q \left( \frac{U_{10}}{U_R} \right)^{p_q} + c_q \left[ \frac{U_{10}}{U_R} - 8 \right]^2$ <table><tr><th><math>U_{10}/(\text{m s}^{-1})</math></th><th><math>a_q</math></th><th><math>b_q</math></th><th><math>c_q</math></th><th><math>p_q</math></th></tr><tr><td>0.3-2.2</td><td>0</td><td>1.23</td><td>0</td><td>-0.16</td></tr><tr><td>2.2-5</td><td>0.969</td><td>0.0521</td><td>0</td><td>1</td></tr><tr><td>5-8</td><td>1.18</td><td>0.01</td><td>0</td><td>1</td></tr><tr><td>8-25</td><td>1.196</td><td>0.008</td><td>-0.0004</td><td>1</td></tr><tr><td>25-50</td><td>1.68</td><td>-0.016</td><td>0</td><td>1</td></tr></table> |                                                                                                                                                                                                                                                                                                                                                | $U_{10}/(\text{m s}^{-1})$ | $a_q$   | $b_q$ | $c_q$ | $p_q$ | 0.3-2.2 | 0 | 1.23 | 0 | -0.16 | 2.2-5 | 0.969 | 0.0521 | 0 | 1 | 5-8 | 1.18 | 0.01 | 0 | 1 | 8-25 | 1.196 | 0.008 | -0.0004 | 1 | 25-50 | 1.68 | -0.016 | 0 | 1 |
| $U_{10}/(\text{m s}^{-1})$                                                                                                                                                                                                                                                                                                                                                                                                                                                                                                                                                                                                                                                                                                                                                                              | $a_q$                                                                                                                                                                                                                                                                                                                                          | $b_q$                      | $c_q$   | $p_q$ |       |       |         |   |      |   |       |       |       |        |   |   |     |      |      |   |   |      |       |       |         |   |       |      |        |   |   |
| 0.3-2.2                                                                                                                                                                                                                                                                                                                                                                                                                                                                                                                                                                                                                                                                                                                                                                                                 | 0                                                                                                                                                                                                                                                                                                                                              | 1.23                       | 0       | -0.16 |       |       |         |   |      |   |       |       |       |        |   |   |     |      |      |   |   |      |       |       |         |   |       |      |        |   |   |
| 2.2-5                                                                                                                                                                                                                                                                                                                                                                                                                                                                                                                                                                                                                                                                                                                                                                                                   | 0.969                                                                                                                                                                                                                                                                                                                                          | 0.0521                     | 0       | 1     |       |       |         |   |      |   |       |       |       |        |   |   |     |      |      |   |   |      |       |       |         |   |       |      |        |   |   |
| 5-8                                                                                                                                                                                                                                                                                                                                                                                                                                                                                                                                                                                                                                                                                                                                                                                                     | 1.18                                                                                                                                                                                                                                                                                                                                           | 0.01                       | 0       | 1     |       |       |         |   |      |   |       |       |       |        |   |   |     |      |      |   |   |      |       |       |         |   |       |      |        |   |   |
| 8-25                                                                                                                                                                                                                                                                                                                                                                                                                                                                                                                                                                                                                                                                                                                                                                                                    | 1.196                                                                                                                                                                                                                                                                                                                                          | 0.008                      | -0.0004 | 1     |       |       |         |   |      |   |       |       |       |        |   |   |     |      |      |   |   |      |       |       |         |   |       |      |        |   |   |
| 25-50                                                                                                                                                                                                                                                                                                                                                                                                                                                                                                                                                                                                                                                                                                                                                                                                   | 1.68                                                                                                                                                                                                                                                                                                                                           | -0.016                     | 0       | 1     |       |       |         |   |      |   |       |       |       |        |   |   |     |      |      |   |   |      |       |       |         |   |       |      |        |   |   |

(B) Parameterization for diabatic stratification (Kondo 1975, Appendix 3) [160]

$$C_q \approx C_q^N \times \begin{cases} 0.01 + 0.03\hat{S} + 0.9\exp(4.8\hat{S}) & \text{for } T_{SST} - T < 0 \text{ and } -3.3 < \hat{S} < 0 \text{ (stable stratification)} \\ 0 & \text{for } T_{SST} - T < 0 \text{ and } \hat{S} \leq -3.3 \text{ (very stable stratification)} \\ 1.0 + 0.63\hat{S}^{1/2} & \text{for } T_{SST} - T > 0 \text{ (unstable stratification)} \end{cases}$$

$$\hat{S} = \hat{S}_0 \frac{|\hat{S}_0|}{|\hat{S}_0| + 0.01}, \quad \hat{S}_0 = \frac{S_0}{S_R}, \quad S_0 = \frac{T_{SST} - T}{\left(U \left[1.0 + \log_{10}\left(\frac{10 \text{ m}}{z}\right)\right]\right)^2}, \quad S_R = 1 \text{ K (m/s)}^{-2}$$

Parameterization of the Dalton number according to Miller et al. (1992, Eqs. (2), (3), Fig. 3) [156]

$$C_q = C_q^N F_q \left( \text{Ri}_o, \frac{z_1}{z_0}, \frac{z_1}{z_{0,T}}, \frac{z_1}{z_{0,q}} \right), \quad C_q^N = \frac{\kappa^2}{\left[ \ln \frac{z_1}{z_0} \right] \left[ \ln \frac{z_1}{z_{0,q}} \right]}$$

Rough-wind regime (Charnock relation)

$$z_0 = \max \left( 0.018 \frac{u_*^2}{g}, 1.15 \cdot 10^{-5} \text{ m} \right)$$

Weak-wind regime (smooth surface)

$$z_0 = 0.11 \frac{\nu}{u_*} + 0.018 \frac{u_*^2}{g}, \quad z_{0,T} = 0.40 \frac{\nu}{u_*} + 1.4 \cdot 10^{-5} \text{ m}, \quad z_{0,q} = 0.62 \frac{\nu}{u_*} + 1.3 \cdot 10^{-4} \text{ m}$$

Free-convection limit of ocean evaporation

$$J_q = \varrho_{AV} L_V D'_q [q_{eq}(S_A, T) - q_1], \quad D'_q = 0.17 \left( \frac{g \alpha_m^2}{\nu \theta_v} \right)^{1/3} (\theta_{v,s} - \theta_{v,1})^{1/3}$$

Dalton number with consideration of the free-convection limit

$$C_q = C_q^N (1 + C_R^\gamma)^{1/\gamma}, \quad C_q^N = \left( \frac{\kappa}{\ln(z_1/z_0)} \right)^2, \quad C_R = \frac{\eta}{C_q^N U_1} (\theta_{v,s} - \theta_{v,1})^{1/3}$$

$$\gamma = 1.25, \quad \eta = 0.0016 \text{ m s}^{-1} \text{ K}^{-1/3}, \quad z_0 = \text{from the Charnock formula}$$

|                                                                                                                                                                                                                                                                                                                                                                                                                                                                                                                               |
|-------------------------------------------------------------------------------------------------------------------------------------------------------------------------------------------------------------------------------------------------------------------------------------------------------------------------------------------------------------------------------------------------------------------------------------------------------------------------------------------------------------------------------|
| Parameterization of Dalton number according to Large and Yeager (2004, Eq. (6)) [126]                                                                                                                                                                                                                                                                                                                                                                                                                                         |
| $C_q \times 10^3 = \begin{cases} 18.0 \sqrt{C_U} & \text{for } \zeta > 0 \\ 32.7 \sqrt{C_U} & \text{for } \zeta \leq 0 \end{cases}, \quad C_U \times 10^3 = \frac{2.7 \text{ m s}^{-1}}{U_{10}} + 0.142 + \frac{U_{10}}{13.09 \text{ m s}^{-1}}$                                                                                                                                                                                                                                                                              |
| Parameterization of Dalton number according to Large and Yeager (2009) [127]                                                                                                                                                                                                                                                                                                                                                                                                                                                  |
| $C_q^N = \frac{\kappa \sqrt{C_U^N}}{\ln(10 \text{ m}/z_{0,q})}, \quad C_U^N = \begin{cases} \frac{a_1}{\hat{U}_{10}} + a_2 + a_3 \hat{U}_{10} + a_8 [\hat{U}_{10}]^6 & \text{for } \hat{U}_{10} \geq 33 \\ 0.00234 & \text{for } \hat{U}_{10} < 33 \end{cases}$ $\hat{U}_{10} = \frac{U_{10}}{\kappa U_R}, \quad U_R = 1 \text{ m s}^{-1}, \quad a_1 = 2.7 \cdot 10^{-3}, \quad a_2 = 1.42 \cdot 10^{-4}, \quad a_3 = 7.64 \cdot 10^{-5}, \quad a_8 = -3.14807 \cdot 10^{-13}$ $\frac{1}{\ln(10 \text{ m}/z_{0,q})} = 0.0346$ |
| Parameterization of the wind function $\xi(U)$ in dependence on the wind velocity, the difference between water and air temperatures, and on the humidity deficit according to Babkin (2023, Eq. (1)) [189]                                                                                                                                                                                                                                                                                                                   |
| $E = \xi(U) U [q_{eq}(S_A, T) - q]$                                                                                                                                                                                                                                                                                                                                                                                                                                                                                           |
